# Supplementary material
Source: PubMed Central journal article supplement (PMC8675529)

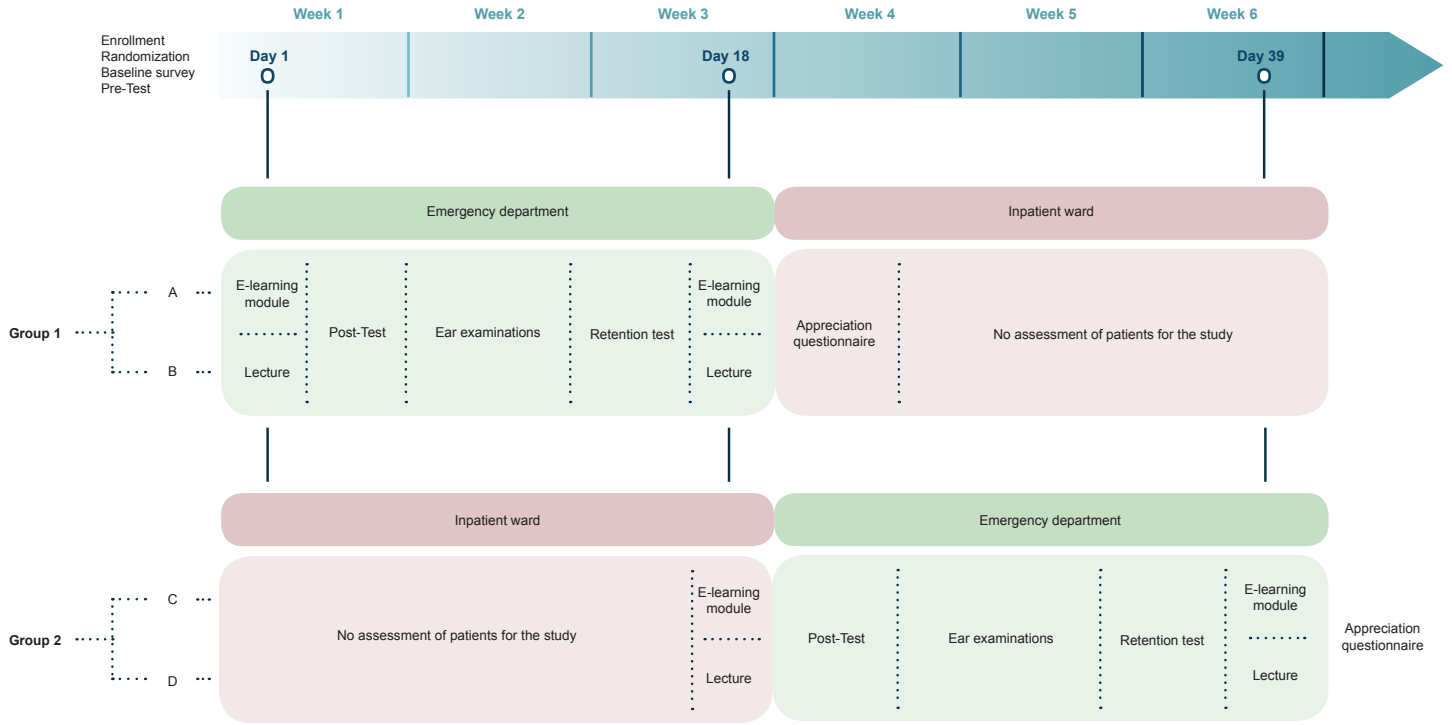

Supplement: pxab009_suppl_supplementary_appendix_1.pdf [file pxab009_suppl_supplementary_appendix_1.pdf]
